# Supplementary material for: Mobile Health Technology (mDiab) for the Prevention of Type 2 Diabetes: Protocol for a Randomized Controlled Trial
Source: PubMed Central journal article supplement (PMC5743924; doi:10.2196/resprot.8644), 2017-12-12
Supplement: resprot_v6i12e242_app1.pdf [file resprot_v6i12e242_app1.pdf]

**TABLE 1: Summary of study measures**

| <b>MEASUREMENTS</b>                                                                                                                         | <b>Screening</b> | <b>Baseline</b> | <b>Post-intervention</b> | <b>End of follow-up</b> |
|---------------------------------------------------------------------------------------------------------------------------------------------|------------------|-----------------|--------------------------|-------------------------|
| <b>Questionnaires</b>                                                                                                                       |                  |                 |                          |                         |
| Short questionnaire                                                                                                                         | ✓                |                 |                          |                         |
| Questionnaires measuring participants' health habits, diet behavior, quality of life, health related costs and physical activity/inactivity |                  | ✓               | ✓                        | ✓                       |
| <b>Anthropometry</b>                                                                                                                        |                  |                 |                          |                         |
| Weight (kg)                                                                                                                                 |                  | ✓               | ✓                        | ✓                       |
| Height (cm)                                                                                                                                 |                  | ✓               | ✓                        | ✓                       |
| Waist circumference (cm)                                                                                                                    | ✓                | ✓               | ✓                        | ✓                       |
| Body fat (%)                                                                                                                                |                  | ✓               | ✓                        | ✓                       |
| Blood pressure                                                                                                                              |                  | ✓               | ✓                        | ✓                       |
| Indian Diabetes Risk Score                                                                                                                  | ✓                |                 |                          |                         |
| <b>Biochemical parameters</b>                                                                                                               |                  |                 |                          |                         |
| Capillary blood glucose                                                                                                                     | ✓                |                 |                          |                         |
| Venous fasting blood glucose                                                                                                                |                  | ✓               | ✓                        | ✓                       |
| Post glucose load (2 hour)                                                                                                                  |                  | ✓               |                          | ✓                       |
| Fasting insulin assay                                                                                                                       |                  | ✓               | ✓                        | ✓                       |
| Glycated hemoglobin (HbA1c)                                                                                                                 |                  | ✓               | ✓                        | ✓                       |
| Lipid profile                                                                                                                               |                  | ✓               | ✓                        | ✓                       |
